# Supplementary material for: A DFT study on the reaction mechanism between tetrachloro-o-benzoquinone and H2O2and an alternative reaction approach to produce the hydroxyl radical
Source: Royal Society of Chemistry journal article supplement (doi:10.1039/c7ra01878a), 2017-01-01
Supplement: c7ra01878a1.pdf [file c7ra01878a1.pdf]

## **A DFT study on the reaction mechanism between tetrachloro-*o*-benzoquinone and H<sub>2</sub>O<sub>2</sub> and an alternative reaction approach to produce the radicals**

Ping Li<sup>\*,a</sup>, Chao Guo<sup>a</sup>, Wenling Feng<sup>a</sup>, Qiao Sun<sup>b</sup>, Weihua Wang<sup>\*,a</sup>

<sup>a</sup> Key Laboratory of Life-Organic Analysis, School of Chemistry and Chemical Engineering, Qufu Normal University, Qufu, 273165, P. R. China

<sup>b</sup> Collaborative Innovation Center of Radiation Medicine of Jiangsu Higher Education Institutions, School for Radiological and Interdisciplinary Sciences, Soochow University, Suzhou, 215123, P. R. China

**E-mail:** lignip@163.com (Ping Li); wwh78@163.com (Weihua Wang)

Supplementary Material

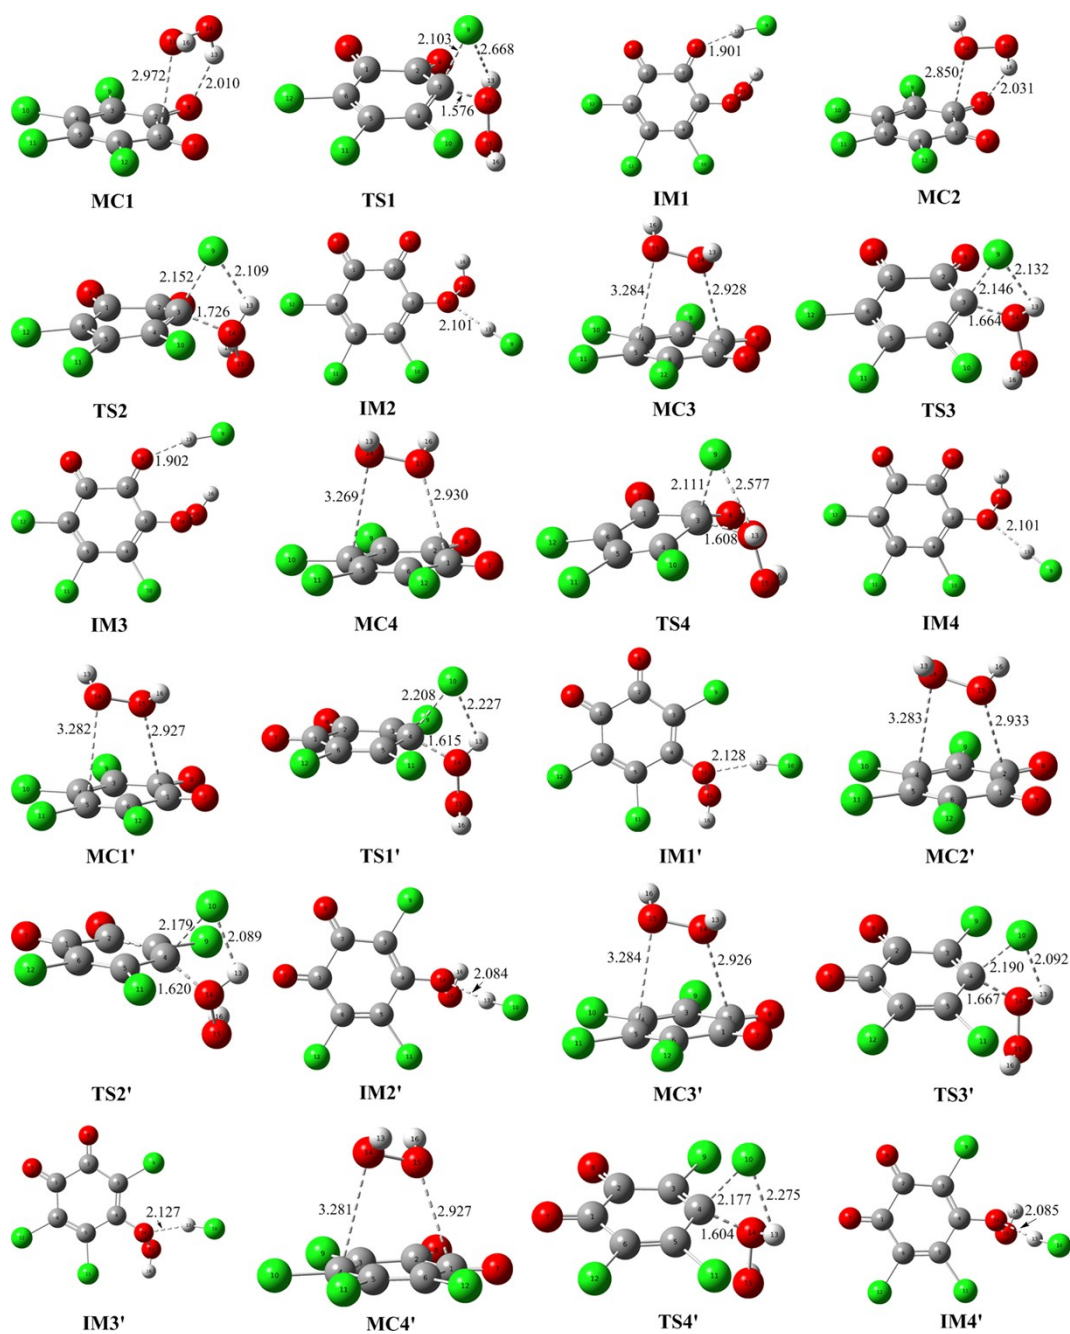

**Figure S1.** Optimized molecular complexes (MC), transition states (TS), and intermediates (IM) in the direct nucleophilic attack process of H<sub>2</sub>O<sub>2</sub> to *o*-TCBQ. The selected interatomic distances are given in Å.

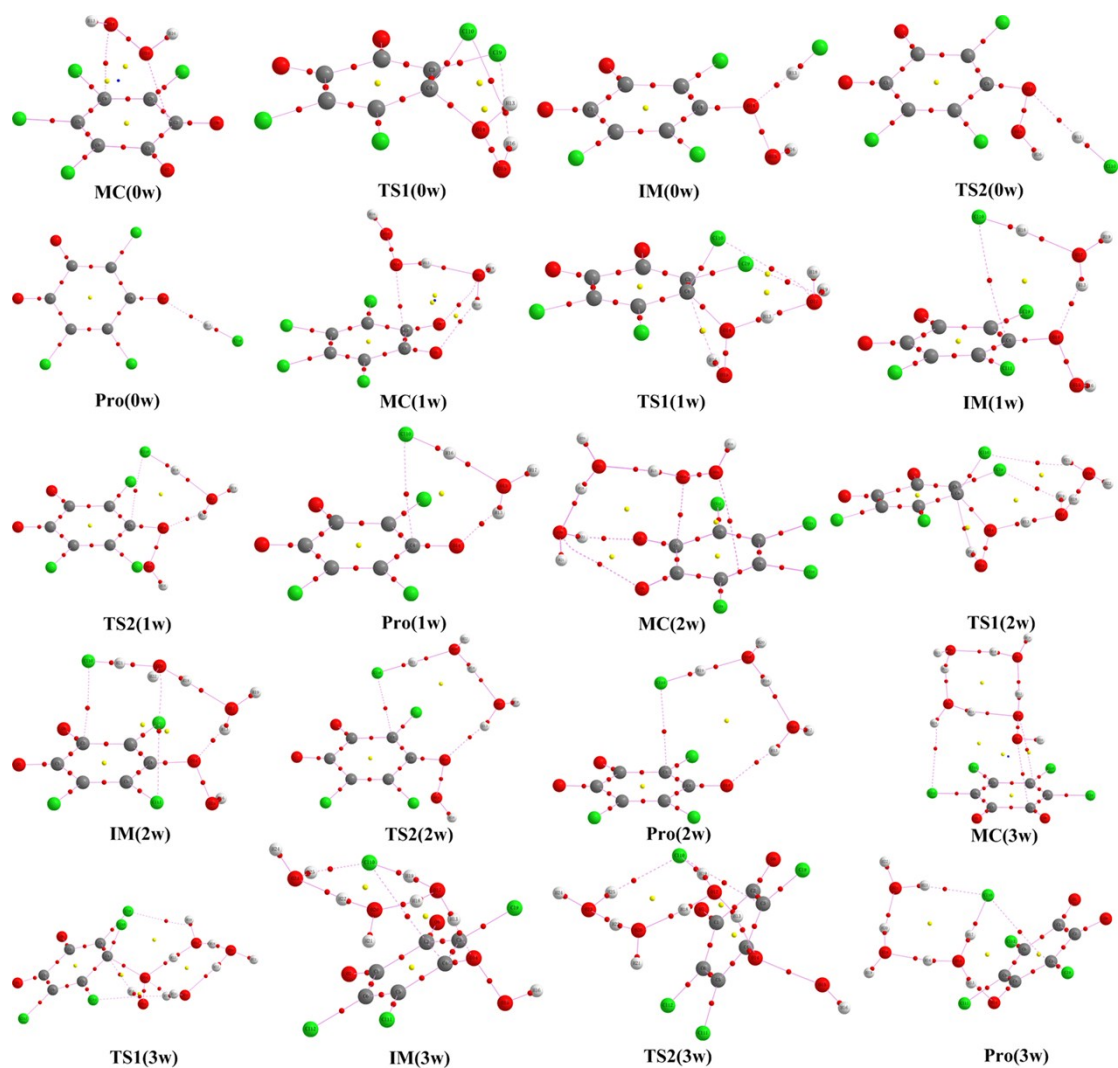

**Figure S2.** Molecular diagrams of the molecular complexes (MC), intermediates (IM), transition states (TS), and products (Pro) in different reaction paths. BCP and RCP are represented by red and small yellow dots, respectively.

**Table S1** The topological parameters at the BCPs for the molecular complexes, intermediates, transition states, and products in the available reaction pathways <sup>a</sup>

| Species | BCP        | $\rho_{\text{bcp}}$ | $\nabla^2\rho_{\text{bcp}}$ | $V_{\text{bcp}}$ | $G_{\text{bcp}}$ | $H_{\text{bcp}}$ |
|---------|------------|---------------------|-----------------------------|------------------|------------------|------------------|
| MC(0w)  | C2 - O15   | 0.0102              | 0.0367                      | -0.0065          | 0.0078           | 0.0014           |
|         | C4 - O14   | 0.0057              | 0.0200                      | -0.0034          | 0.0042           | 0.0008           |
| IM(0w)  | C4 - O14   | 0.2898              | -0.4710                     | -0.7071          | 0.2947           | -0.4124          |
|         | H13 - O14  | 0.0177              | 0.0625                      | -0.0111          | 0.0134           | 0.0023           |
|         | O14 - O15  | 0.2544              | 0.1215                      | -0.3347          | 0.1825           | -0.1522          |
| Pro(0w) | H13 - O14  | 0.0192              | 0.0724                      | -0.0122          | 0.0151           | 0.0030           |
| MC(1w)  | C1 - O14   | 0.0130              | 0.0450                      | -0.0082          | 0.0097           | 0.0015           |
|         | O7 - H19   | 0.0172              | 0.0642                      | -0.0117          | 0.0139           | 0.0022           |
|         | O14 - O15  | 0.2745              | 0.0369                      | -0.3666          | 0.1879           | -0.1787          |
|         | O8 - O17   | 0.0072              | 0.0257                      | -0.0050          | 0.0057           | 0.0007           |
|         | H13 - O17  | 0.0382              | 0.1204                      | -0.0327          | 0.0314           | -0.0013          |
| IM(1w)  | C4 - Cl10  | 0.0037              | 0.0096                      | -0.0015          | 0.0020           | 0.0004           |
|         | O14 - O15  | 0.2556              | 0.1189                      | -0.3369          | 0.1833           | -0.1536          |
|         | H13 - O14  | 0.0179              | 0.0705                      | -0.0127          | 0.0151           | 0.0025           |
|         | O17 - H18  | 0.0368              | 0.1121                      | -0.0284          | 0.0282           | -0.0002          |
| Pro(1w) | C4 - Cl10  | 0.0047              | 0.0142                      | -0.0019          | 0.0027           | 0.0008           |
|         | H13 - O14  | 0.0200              | 0.0821                      | -0.0146          | 0.0175           | 0.0030           |
|         | O15 - H16  | 0.0413              | 0.1179                      | -0.0331          | 0.0313           | -0.0018          |
| MC(2w)  | C4 - O14   | 0.4011              | -0.1415                     | -1.3010          | 0.6328           | -0.6682          |
|         | O8 - O20   | 0.0092              | 0.0345                      | -0.0065          | 0.0076           | 0.0011           |
|         | O7 - H22   | 0.0210              | 0.0785                      | -0.0148          | 0.0172           | 0.0024           |
|         | H13 - O14  | 0.3308              | -2.3234                     | -0.7074          | 0.0632           | -0.6441          |
|         | H18 - O20  | 0.0390              | 0.1232                      | -0.0339          | 0.0324           | -0.0016          |
|         | C1 - O14   | 0.0148              | 0.0519                      | -0.0099          | 0.0114           | 0.0015           |
|         | C3 - O15   | 0.0061              | 0.0210                      | -0.0036          | 0.0044           | 0.0008           |
| IM(2w)  | H13 - O17  | 0.0447              | 0.1380                      | -0.0416          | 0.0381           | -0.0036          |
|         | C2 - Cl10  | 0.0058              | 0.0188                      | -0.0025          | 0.0036           | 0.0011           |
|         | Cl11 - O20 | 0.0012              | 0.0040                      | -0.0005          | 0.0007           | 0.0003           |
|         | O14 - O15  | 0.2543              | 0.1233                      | -0.3347          | 0.1828           | -0.1520          |
|         | H13 - O14  | 0.0197              | 0.0774                      | -0.0142          | 0.0168           | 0.0026           |
|         | O17 - H18  | 0.0351              | 0.1218                      | -0.0303          | 0.0304           | 0.0001           |
| Pro(2w) | O20 - H21  | 0.0486              | 0.1303                      | -0.0420          | 0.0373           | -0.0047          |
|         | C3 - Cl10  | 0.0071              | 0.0197                      | -0.0030          | 0.0039           | 0.0010           |
|         | H13 - O14  | 0.0229              | 0.0958                      | -0.0174          | 0.0207           | 0.0033           |
|         | O15 - H16  | 0.0384              | 0.1281                      | -0.0342          | 0.0331           | -0.0011          |
|         | O18 - H19  | 0.0578              | 0.1338                      | -0.0524          | 0.0429           | -0.0095          |
| MC(3w)  | Cl10 - H19 | 0.2060              | -0.5255                     | -0.2177          | 0.0432           | -0.1745          |
|         | Cl12 - H24 | 0.0060              | 0.0195                      | -0.0028          | 0.0038           | 0.0011           |
|         | C4 - O14   | 0.0044              | 0.0167                      | -0.0027          | 0.0034           | 0.0007           |
|         | C2 - O15   | 0.0101              | 0.0336                      | -0.0063          | 0.0073           | 0.0010           |
|         | O14 - O15  | 0.2747              | 0.0403                      | -0.3674          | 0.1887           | -0.1787          |

|           |            |        |         |         |         |         |
|-----------|------------|--------|---------|---------|---------|---------|
| IM(3w)    | O14 - H25  | 0.0263 | 0.0902  | -0.0196 | 0.0211  | 0.0015  |
|           | H13 - O17  | 0.0492 | 0.1433  | -0.0471 | 0.0415  | -0.0056 |
|           | H18 - O20  | 0.0405 | 0.1295  | -0.0364 | 0.0344  | -0.0020 |
|           | H22 - O23  | 0.0336 | 0.1189  | -0.0286 | 0.0292  | 0.0005  |
|           | C4 - C110  | 0.0057 | 0.0158  | -0.0024 | 0.0032  | 0.0008  |
|           | H13 - O14  | 0.0220 | 0.0866  | -0.0167 | 0.0192  | 0.0025  |
|           | O14 - O15  | 0.2554 | 0.1207  | -0.3370 | 0.1836  | -0.1534 |
|           | H18 - O20  | 0.0588 | 0.1506  | -0.0600 | 0.0488  | -0.0112 |
|           | C110 - H19 | 0.1091 | -0.0614 | -0.1047 | 0.0447  | -0.0600 |
|           | O17 - H19  | 0.1871 | -0.4719 | -0.2818 | 0.0819  | -0.1999 |
| Pro(3w)   | H18 - O20  | 0.0588 | 0.1506  | -0.0600 | 0.0488  | -0.0112 |
|           | H22 - O23  | 0.0425 | 0.1334  | -0.0389 | 0.0362  | -0.0028 |
|           | C110 - H25 | 0.0231 | 0.0631  | -0.0141 | 0.0149  | 0.0008  |
|           | C3 - C110  | 0.0136 | 0.0370  | -0.0065 | 0.0078  | 0.0014  |
|           | H13 - O14  | 0.0355 | 0.1222  | -0.0309 | 0.0307  | -0.0002 |
|           | C110 - H17 | 0.0639 | 0.0472  | -0.0566 | 0.0342  | -0.0224 |
|           | C110 - H23 | 0.0241 | 0.0646  | -0.0150 | 0.0156  | 0.0006  |
|           | H20 - O21  | 0.0457 | 0.1383  | -0.0430 | 0.0388  | -0.0042 |
| H16 - O18 | 0.0745     | 0.1514 | -0.0806 | 0.0592  | -0.0214 |         |

<sup>a</sup> Atomic numbering refers to Figure 2. The  $\rho_{\text{bcp}}$ ,  $\nabla^2\rho_{\text{bcp}}$ ,  $V_{\text{bcp}}$ ,  $G_{\text{bcp}}$ , and  $H_{\text{bcp}}$  is electron density, the Laplacian of the electron density, potential energy density, kinetic energy density, and energy density at the BCP, respectively. The electron density at the BCP of the O-O bond of  $\text{H}_2\text{O}_2$  is 0.2725.

Cartesian coordinates of all the species mentioned in this study\*

| <i>o</i> -TCBQ     |             |             |             | H <sub>2</sub> O <sub>2</sub>      |             |             |             | HO <sub>2</sub> <sup>-</sup>      |             |             |             |
|--------------------|-------------|-------------|-------------|------------------------------------|-------------|-------------|-------------|-----------------------------------|-------------|-------------|-------------|
| C                  | -0.78016400 | 1.73275000  | 0.00008800  | H                                  | 1.02761800  | -0.66872100 | 0.41472200  | H                                 | -0.89358800 | -0.86352400 | 0.00000000  |
| C                  | 0.78016400  | 1.73275000  | 0.00009900  | O                                  | 0.71725800  | 0.11966200  | -0.05192400 | O                                 | 0.05584900  | -0.70724000 | 0.00000000  |
| C                  | 1.45930400  | 0.41679500  | 0.00004400  | O                                  | -0.71748300 | -0.11978500 | -0.05171000 | O                                 | 0.05584900  | 0.81518000  | 0.00000000  |
| C                  | 0.74117500  | -0.73400400 | 0.00002000  | H                                  | -1.02581700 | 0.66969900  | 0.41434700  |                                   |             |             |             |
| C                  | -0.74117500 | -0.73400400 | 0.00002200  |                                    |             |             |             |                                   |             |             |             |
| C                  | -1.45930400 | 0.41679500  | 0.00004100  |                                    |             |             |             |                                   |             |             |             |
| O                  | -1.36729000 | 2.78329400  | -0.00010100 |                                    |             |             |             |                                   |             |             |             |
| O                  | 1.36729000  | 2.78329400  | -0.00009800 |                                    |             |             |             |                                   |             |             |             |
| Cl                 | 3.18320400  | 0.45258800  | 0.00002000  |                                    |             |             |             |                                   |             |             |             |
| Cl                 | 1.54775800  | -2.26197600 | -0.00003200 |                                    |             |             |             |                                   |             |             |             |
| Cl                 | -1.54775800 | -2.26197600 | -0.00002400 |                                    |             |             |             |                                   |             |             |             |
| Cl                 | -3.18320400 | 0.45258700  | 0.00001800  |                                    |             |             |             |                                   |             |             |             |
| <i>o</i> -TCBQ-PCM |             |             |             | H <sub>2</sub> O <sub>2</sub> -PCM |             |             |             | HO <sub>2</sub> <sup>-</sup> -PCM |             |             |             |
| C                  | -0.00339300 | -0.77955600 | 1.72350200  | H                                  | -1.02340500 | 0.61080200  | 0.50857900  | O                                 | 0.05552100  | -0.69655200 | 0.00000000  |
| C                  | 0.00339300  | 0.77955600  | 1.72350200  | O                                  | -0.71693400 | -0.10898900 | -0.06357100 | H                                 | -0.88833600 | -0.89235400 | 0.00000000  |
| C                  | 0.00087200  | 1.45829400  | 0.41693600  | O                                  | 0.71693100  | 0.10898500  | -0.06357700 | O                                 | 0.05552100  | 0.80809700  | 0.00000000  |
| C                  | -0.00087200 | 0.74157200  | -0.73461600 | H                                  | 1.02343100  | -0.61077300 | 0.50859800  |                                   |             |             |             |
| C                  | 0.00087200  | -0.74157200 | -0.73461600 |                                    |             |             |             |                                   |             |             |             |
| C                  | -0.00087200 | -1.45829400 | 0.41693600  |                                    |             |             |             |                                   |             |             |             |
| O                  | -0.00973700 | -1.36053500 | 2.78226900  |                                    |             |             |             |                                   |             |             |             |
| O                  | 0.00973700  | 1.36053500  | 2.78226900  |                                    |             |             |             |                                   |             |             |             |
| Cl                 | 0.00039100  | 3.18486700  | 0.45293300  |                                    |             |             |             |                                   |             |             |             |
| Cl                 | -0.00532200 | 1.54679000  | -2.25840800 |                                    |             |             |             |                                   |             |             |             |
| Cl                 | 0.00532200  | -1.54679000 | -2.25840800 |                                    |             |             |             |                                   |             |             |             |
| Cl                 | -0.00039100 | -3.18486700 | 0.45293300  |                                    |             |             |             |                                   |             |             |             |
| MCI                |             |             |             | TSI                                |             |             |             | IMI                               |             |             |             |
| C                  | 0.33220500  | -1.42101400 | -0.78237500 | C                                  | 0.94224300  | -1.74121000 | -0.11005400 | C                                 | 0.44250600  | -1.74739100 | -0.09449700 |
| C                  | 1.37530200  | -0.26755300 | -0.73431900 | C                                  | -0.58741800 | -1.55549500 | -0.27167500 | C                                 | -0.84914800 | -0.88991000 | 0.05025900  |
| C                  | 0.88380500  | 1.08329200  | -0.40725800 | C                                  | -1.16646800 | -0.22690500 | 0.08099700  | C                                 | -0.69855400 | 0.57306300  | 0.03812100  |
| C                  | -0.41238000 | 1.27710000  | -0.05432300 | C                                  | -0.37644300 | 0.88183000  | -0.04169600 | C                                 | 0.54108200  | 1.13547900  | 0.04961200  |
| C                  | -1.38588800 | 0.16145800  | 0.00249300  | C                                  | 1.06342400  | 0.71947900  | -0.02163700 | C                                 | 1.77867700  | 0.32367800  | 0.05998400  |
| C                  | -1.04097200 | -1.10704800 | -0.32972300 | C                                  | 1.69852200  | -0.50166200 | -0.03058400 | C                                 | 1.73941900  | -1.03044000 | -0.02128000 |
| O                  | 0.66887700  | -2.50311500 | -1.19001100 | O                                  | 1.39004200  | -2.86536500 | -0.10924400 | O                                 | 0.34817200  | -2.93742400 | -0.24627600 |
| O                  | 2.53523800  | -0.51358800 | -0.97014900 | O                                  | -1.31455900 | -2.40469700 | -0.73514000 | O                                 | -1.90958300 | -1.45991800 | 0.18724800  |
| Cl                 | 2.04659900  | 2.35402500  | -0.46648400 | Cl                                 | -2.22164300 | -0.61574600 | 1.85799600  | Cl                                | -4.95484000 | -0.55211200 | 0.29873200  |
| Cl                 | -0.97193700 | 2.85754800  | 0.35514100  | Cl                                 | -1.13287200 | 2.45457800  | 0.03458600  | Cl                                | 0.67930400  | 2.85103900  | 0.07551200  |
| Cl                 | -2.99874200 | 0.52131100  | 0.50536000  | Cl                                 | 2.00497200  | 2.16711400  | 0.04713200  | Cl                                | 3.28930900  | 1.15294400  | 0.15364300  |
| Cl                 | -2.14855600 | -2.42872300 | -0.28911600 | Cl                                 | 3.42375500  | -0.66402600 | 0.04079600  | Cl                                | 3.15161000  | -2.01510000 | -0.04910900 |
| H                  | 3.27612900  | -1.53593000 | 0.59388900  | H                                  | -2.75272300 | -1.15755700 | -0.69976700 | H                                 | -3.76045400 | -1.07128600 | 0.37581700  |
| O                  | 3.22600000  | -1.72507700 | 1.54932600  | O                                  | -2.56325400 | -0.17129100 | -0.64760700 | O                                 | -1.80096300 | 1.35127900  | 0.14633300  |
| O                  | 1.80637500  | -1.57151400 | 1.79423700  | O                                  | -2.43591500 | 0.16160800  | -2.08044900 | O                                 | -2.55686400 | 1.23612300  | -1.11676900 |
| H                  | 1.55434900  | -2.48586000 | 1.98857800  | H                                  | -2.56257500 | 1.12662100  | -2.02146700 | H                                 | -3.42105400 | 0.93880500  | -0.77251900 |

| MC2 |             |             |             | TS2 |             |             | IM2         |    |             |             |             |
|-----|-------------|-------------|-------------|-----|-------------|-------------|-------------|----|-------------|-------------|-------------|
| C   | 0.70613900  | -1.26276400 | -0.74321500 | C   | 0.84114100  | -1.75631400 | 0.10444300  | C  | 1.78573500  | -1.56078000 | 0.16459300  |
| C   | 1.40532100  | 0.12707500  | -0.69911700 | C   | -0.68330200 | -1.47478400 | -0.10398000 | C  | 0.26136400  | -1.84903100 | 0.06217200  |
| C   | 0.57047600  | 1.29764500  | -0.37760100 | C   | -1.13189700 | -0.08901900 | 0.08208200  | C  | -0.63366600 | -0.70247200 | -0.15919300 |
| C   | -0.73780300 | 1.14130000  | -0.05010900 | C   | -0.25236200 | 0.93275500  | -0.08422200 | C  | -0.15132900 | 0.56469800  | -0.21452500 |
| C   | -1.38520600 | -0.19088200 | -0.00521600 | C   | 1.19107000  | 0.66247700  | -0.08626200 | C  | 1.29101600  | 0.85462000  | -0.04616700 |
| C   | -0.71075100 | -1.32425600 | -0.31881300 | C   | 1.72016900  | -0.59184900 | 0.02298000  | C  | 2.20324200  | -0.13642300 | 0.12557300  |
| O   | 1.32965500  | -2.21611900 | -1.13005500 | O   | 1.18847200  | -2.89932200 | 0.26743600  | O  | 2.55695300  | -2.47853100 | 0.27060400  |
| O   | 2.58816300  | 0.19626200  | -0.94145600 | O   | -1.41835900 | -2.36567300 | -0.47357600 | O  | -0.15117200 | -2.98220100 | 0.16283300  |
| CI  | 1.35755500  | 2.83335400  | -0.41730700 | CI  | -2.45295100 | -0.05395900 | 1.78027200  | CI | -4.88542600 | 0.51105500  | 0.76202500  |
| CI  | -1.70176300 | 2.51908600  | 0.34156900  | CI  | -0.84024600 | 2.56003000  | -0.09304000 | CI | -1.24444100 | 1.87461100  | -0.44960100 |
| CI  | -3.04685700 | -0.26717500 | 0.46394000  | CI  | 2.23903600  | 2.02884500  | -0.19107000 | CI | 1.78674700  | 2.50637500  | -0.09061200 |
| CI  | -1.42776600 | -2.88924400 | -0.29092700 | CI  | 3.42032300  | -0.90576400 | 0.08764600  | CI | 3.88954200  | 0.16081600  | 0.31013700  |
| H   | 2.44512600  | -0.32003700 | 2.49981000  | H   | -3.27296100 | -0.17957700 | -0.15898700 | H  | -3.79300500 | -0.01811000 | 0.31663100  |
| O   | 2.19580400  | -0.95700500 | 1.81556300  | O   | -2.59035600 | 0.11302500  | -0.81844800 | O  | -1.97293000 | -0.94341800 | -0.17800500 |
| O   | 3.50084400  | -1.36127400 | 1.33090300  | O   | -2.74740800 | -0.60956400 | -2.05182300 | O  | -2.29562100 | -1.86853200 | -1.27087200 |
| H   | 3.47024900  | -1.03594100 | 0.41127400  | H   | -2.51949600 | -1.52332100 | -1.76470900 | H  | -2.13217700 | -2.72268400 | -0.83096600 |
| MC3 |             |             |             | TS3 |             |             | IM3         |    |             |             |             |
| C   | -0.77894100 | -1.61326600 | -0.54657800 | C   | 1.12343300  | -1.71016500 | -0.10621500 | C  | 0.44304800  | -1.74742100 | -0.09465200 |
| C   | 0.77835900  | -1.61690100 | -0.57875400 | C   | -0.43868700 | -1.69397600 | -0.26361800 | C  | -0.84903400 | -0.89028900 | 0.04984700  |
| C   | 1.46070400  | -0.31121400 | -0.42597400 | C   | -1.11368400 | -0.38948200 | 0.01742800  | C  | -0.69868600 | 0.57272900  | 0.03803700  |
| C   | 0.74882800  | 0.83518500  | -0.30889300 | C   | -0.39300400 | 0.76379000  | -0.02136900 | C  | 0.54085400  | 1.13532400  | 0.04953700  |
| C   | -0.73077800 | 0.84278700  | -0.32535100 | C   | 1.06609100  | 0.74323500  | 0.00460300  | C  | 1.77867100  | 0.32388600  | 0.05992500  |
| C   | -1.45067500 | -0.29953100 | -0.43729600 | C   | 1.79342500  | -0.41086800 | -0.02698200 | C  | 1.73977100  | -1.03026600 | -0.02105700 |
| O   | -1.37290500 | -2.65893600 | -0.61986100 | O   | 1.67705500  | -2.78105900 | -0.09739200 | O  | 0.34897400  | -2.93746000 | -0.24667300 |
| O   | 1.36315400  | -2.65723800 | -0.73386700 | O   | -1.02175200 | -2.67567700 | -0.62418900 | O  | -1.90931100 | -1.46052400 | 0.18635100  |
| CI  | 3.18615700  | -0.35597700 | -0.40487900 | CI  | -2.41556300 | -0.72240300 | 1.69021600  | CI | -4.95509200 | -0.55215400 | 0.29885400  |
| CI  | 1.56325500  | 2.35134600  | -0.12794600 | CI  | -1.25729100 | 2.28331500  | 0.14298800  | CI | 0.67865400  | 2.85098000  | 0.07568900  |
| CI  | -1.53247500 | 2.36771000  | -0.18763500 | CI  | 1.87052400  | 2.27112200  | 0.09446400  | CI | 3.28919200  | 1.15348800  | 0.15307900  |
| CI  | -3.17733500 | -0.32827800 | -0.43798800 | CI  | 3.52360900  | -0.43871900 | 0.02429400  | CI | 3.15213100  | -2.01470500 | -0.04837400 |
| H   | -0.65708100 | -1.86815900 | 2.65815000  | H   | -3.22993800 | -0.13645700 | -0.19112400 | H  | -3.76130100 | -1.07259000 | 0.37572800  |
| O   | 0.06756000  | -1.37014600 | 2.25100900  | O   | -2.52711300 | -0.35409800 | -0.85930900 | O  | -1.80115400 | 1.35083000  | 0.14669100  |
| O   | -0.16068500 | -0.04221300 | 2.78520900  | O   | -2.61893800 | 0.47176500  | -2.03362400 | O  | -2.55704500 | 1.23604200  | -1.11642000 |
| H   | 0.64187600  | 0.08243000  | 3.31261800  | H   | -2.33125800 | 1.34744000  | -1.69920500 | H  | -3.42119600 | 0.93835200  | -0.77236000 |
| MC4 |             |             |             | TS4 |             |             | IM4         |    |             |             |             |
| C   | -0.77940200 | -1.61992200 | -0.57288900 | C   | 0.96826700  | -1.73170100 | -0.00351000 | C  | 1.78624600  | -1.56069400 | 0.16459700  |
| C   | 0.77807100  | -1.61549800 | -0.54429400 | C   | -0.56435900 | -1.57719200 | -0.24736000 | C  | 0.26187300  | -1.84906400 | 0.06230300  |
| C   | 1.44934000  | -0.30139600 | -0.43829200 | C   | -1.15521700 | -0.25470600 | 0.09553400  | C  | -0.63334000 | -0.70253300 | -0.15831500 |
| C   | 0.72906900  | 0.84080400  | -0.32725300 | C   | -0.37152500 | 0.85189900  | -0.08422400 | C  | -0.15114500 | 0.56468600  | -0.21355600 |
| C   | -0.75050100 | 0.83284000  | -0.30966600 | C   | 1.07443700  | 0.72144400  | -0.07190900 | C  | 1.29127900  | 0.85468000  | -0.04601300 |
| C   | -1.46206800 | -0.31414000 | -0.42277800 | C   | 1.72377000  | -0.48526800 | -0.00592500 | C  | 2.20366500  | -0.13632700 | 0.12511100  |
| O   | -1.36397100 | -2.66106200 | -0.72338500 | O   | 1.42340200  | -2.84655200 | 0.09846600  | O  | 2.55750900  | -2.47836600 | 0.27091700  |
| O   | 1.37213800  | -2.66120600 | -0.61668000 | O   | -1.20144100 | -2.44259700 | -0.79362900 | O  | -0.15050800 | -2.98233300 | 0.16254400  |
| CI  | 3.17612100  | -0.32943200 | -0.44045000 | CI  | -2.23267700 | -0.43506800 | 1.90213000  | CI | -4.88729700 | 0.51076700  | 0.75942600  |

|             |             |             |             |             |             |             |             |             |             |             |             |
|-------------|-------------|-------------|-------------|-------------|-------------|-------------|-------------|-------------|-------------|-------------|-------------|
| CI          | 1.53036500  | 2.36610300  | -0.19210000 | CI          | -1.14755800 | 2.41677200  | -0.02930500 | CI          | -1.24453600 | 1.87458000  | -0.44753600 |
| CI          | -1.56518600 | 2.34935800  | -0.13288200 | CI          | 1.98862300  | 2.18795600  | -0.09878000 | CI          | 1.78687800  | 2.50646200  | -0.09062800 |
| CI          | -3.18745700 | -0.35944300 | -0.40024500 | CI          | 3.44893700  | -0.62727800 | 0.07934300  | CI          | 3.89007200  | 0.16100200  | 0.30862300  |
| H           | -0.61987100 | 0.10304700  | 3.31623000  | H           | -3.03334500 | 0.60960900  | -0.31330900 | H           | -3.79319500 | -0.01778200 | 0.31756700  |
| O           | 0.17314100  | -0.02495900 | 2.77533300  | O           | -2.60010300 | -0.22242000 | -0.60940900 | O           | -1.97261000 | -0.94363200 | -0.17658500 |
| O           | -0.06265500 | -1.35771000 | 2.25647500  | O           | -2.54969600 | -0.10345600 | -2.07130900 | O           | -2.29600600 | -1.86839200 | -1.26943500 |
| H           | 0.66825900  | -1.85164800 | 2.65735900  | H           | -2.57071400 | -1.05676600 | -2.28286700 | H           | -2.13233700 | -2.72269700 | -0.82990800 |
| <b>MC1'</b> |             |             |             | <b>TS1'</b> |             |             |             | <b>IM1'</b> |             |             |             |
| C           | 0.77889500  | 1.61360600  | -0.54652400 | C           | 1.33824300  | 1.69724000  | -0.06821300 | C           | -2.23976600 | 1.18270300  | 0.13092900  |
| C           | -0.77843300 | 1.61741400  | -0.57720000 | C           | -0.18276100 | 2.04602200  | -0.02394900 | C           | -0.91193600 | 2.00825000  | 0.03874700  |
| C           | -1.46067200 | 0.31168100  | -0.42503900 | C           | -1.10114000 | 0.92477000  | 0.04527700  | C           | 0.35071700  | 1.24699300  | -0.13778300 |
| C           | -0.74885900 | -0.83493000 | -0.30905900 | C           | -0.64539900 | -0.35579300 | -0.05055600 | C           | 0.33059200  | -0.10718100 | -0.17287400 |
| C           | 0.73074400  | -0.84239600 | -0.32510300 | C           | 0.78235100  | -0.71086300 | 0.05169200  | C           | -0.91647900 | -0.88435800 | -0.01839300 |
| C           | 1.45061500  | 0.29991400  | -0.43741500 | C           | 1.72509900  | 0.25394300  | 0.00049100  | C           | -2.12914100 | -0.29660600 | 0.10925800  |
| O           | 1.37285800  | 2.65927000  | -0.62029000 | O           | 2.15455100  | 2.57653300  | -0.13608900 | O           | -3.28513100 | 1.76903600  | 0.22998400  |
| O           | -1.36327700 | 2.65794200  | -0.73092300 | O           | -0.51639800 | 3.20911900  | -0.04279900 | O           | -0.95996200 | 3.20809300  | 0.08925200  |
| CI          | -3.18616800 | 0.35631400  | -0.40431800 | CI          | -2.80723200 | 1.25077700  | 0.06222300  | CI          | 1.80128900  | 2.15173500  | -0.31591300 |
| CI          | -1.56329700 | -2.35130300 | -0.13045600 | CI          | -1.45668000 | -1.49028900 | -1.76288500 | CI          | 4.71882000  | -0.64627800 | 0.79897400  |
| CI          | 1.53253400  | -2.36719700 | -0.18660200 | CI          | 1.18984500  | -2.38340300 | 0.21876900  | CI          | -0.74429100 | -2.60645400 | 0.04941200  |
| CI          | 3.17728600  | 0.32858300  | -0.43840600 | CI          | 3.41323700  | -0.08662100 | 0.03711600  | CI          | -3.59667800 | -1.18048300 | 0.29284800  |
| H           | -0.64183700 | -0.08554000 | 3.31084800  | H           | -2.37164600 | -1.49664300 | 0.26795400  | H           | 3.52090300  | -0.48188300 | 0.34267700  |
| O           | 0.16093400  | 0.03968700  | 2.78390000  | O           | -1.51745500 | -1.44116500 | 0.76831200  | O           | 1.50656100  | -0.78978300 | -0.26979400 |
| O           | -0.06738700 | 1.36802700  | 2.25089000  | O           | -1.82154500 | -1.07318400 | 2.15439900  | O           | 1.60735600  | -1.35346100 | -1.63020500 |
| H           | 0.65704100  | 1.86565700  | 2.65887800  | H           | -1.28583000 | -1.74359200 | 2.61421300  | H           | 1.57919800  | -2.30285200 | -1.42635700 |
| <b>MC2'</b> |             |             |             | <b>TS2'</b> |             |             |             | <b>IM2'</b> |             |             |             |
| C           | 0.77840200  | 1.61737300  | -0.57766300 | C           | -1.33719200 | 1.69650500  | 0.08149600  | C           | -2.47167600 | 0.16345800  | 0.33669800  |
| C           | -0.77892100 | 1.61372300  | -0.54625600 | C           | 0.18722700  | 2.02843400  | 0.06857400  | C           | -1.77661800 | 1.56744500  | 0.31496700  |
| C           | -1.45075200 | 0.29999200  | -0.43724900 | C           | 1.08155100  | 0.89452700  | -0.01664400 | C           | -0.33322000 | 1.60081600  | -0.03059400 |
| C           | -0.73096000 | -0.84238900 | -0.32534200 | C           | 0.62357900  | -0.39109400 | 0.04531400  | C           | 0.33504700  | 0.45103200  | -0.28153800 |
| C           | 0.74864300  | -0.83488200 | -0.30918500 | C           | -0.81248100 | -0.72169000 | -0.08354600 | C           | -0.31354400 | -0.87586400 | -0.23639600 |
| C           | 1.46056100  | 0.31159200  | -0.42554700 | C           | -1.73830300 | 0.26024200  | -0.02899000 | C           | -1.63117900 | -1.02154400 | 0.04645700  |
| O           | 1.36327100  | 2.65783900  | -0.73168800 | O           | -2.14204500 | 2.58494100  | 0.16178300  | O           | -3.64607800 | 0.10323700  | 0.59151000  |
| O           | -1.37283900 | 2.65941300  | -0.61954300 | O           | 0.54081300  | 3.18502700  | 0.11924400  | O           | -2.42131300 | 2.55242300  | 0.55737000  |
| CI          | -3.17740400 | 0.32889400  | -0.43794700 | CI          | 2.80697600  | 1.20467900  | -0.01333500 | CI          | 0.42868800  | 3.14365600  | -0.11674300 |
| CI          | -1.53277200 | -2.36720500 | -0.18726000 | CI          | 1.37491800  | -1.56222700 | 1.72199900  | CI          | 4.30537600  | -0.70544700 | 1.21434800  |
| CI          | 1.56295100  | -2.35131800 | -0.13001800 | CI          | -1.24225200 | -2.38022900 | -0.27481400 | CI          | 0.70881400  | -2.22971000 | -0.53353600 |
| CI          | 3.18606500  | 0.35609900  | -0.40486300 | CI          | -3.42990500 | -0.05368600 | -0.09982400 | CI          | -2.41621200 | -2.55407600 | 0.10953500  |
| H           | 0.64380500  | -0.08508900 | 3.31122400  | H           | 2.18931200  | -1.76405700 | -0.19095900 | H           | 3.28618500  | -0.35233900 | 0.50118300  |
| O           | -0.15976300 | 0.03979300  | 2.78540500  | O           | 1.49651500  | -1.43612400 | -0.83227100 | O           | 1.68020900  | 0.50087900  | -0.51716800 |
| O           | 0.06805700  | 1.36756400  | 2.25065700  | O           | 2.05123400  | -0.98424900 | -2.08307500 | O           | 1.91522200  | 0.30676700  | -1.96238800 |
| H           | -0.65573300 | 1.86577700  | 2.65906200  | H           | 2.54675800  | -0.17936900 | -1.81013200 | H           | 2.18330100  | 1.20864100  | -2.20461600 |
| <b>MC3'</b> |             |             |             | <b>TS3'</b> |             |             |             | <b>IM3'</b> |             |             |             |
| C           | 0.77884400  | 1.61370200  | -0.54641600 | C           | 1.29367100  | 1.75179200  | -0.03568000 | C           | -2.23972100 | 1.18199400  | 0.13241800  |
| C           | -0.77848800 | 1.61722500  | -0.57774600 | C           | -0.22596500 | 2.09344800  | 0.06033100  | C           | -0.91238900 | 2.00819600  | 0.03919500  |



|                |             |             |             |                |             |             |             |                |             |             |             |
|----------------|-------------|-------------|-------------|----------------|-------------|-------------|-------------|----------------|-------------|-------------|-------------|
| C              | -1.46049500 | 0.31138100  | -0.42562600 | C              | -1.15480900 | 0.97139700  | 0.09549800  | C              | 0.35048000  | 1.24760300  | -0.13886600 |
| C              | -0.74852400 | -0.83505800 | -0.30929600 | C              | -0.70055100 | -0.30207200 | -0.05298700 | C              | 0.33091500  | -0.10657200 | -0.17446500 |
| C              | 0.73110100  | -0.84242900 | -0.32525300 | C              | 0.73085400  | -0.64898600 | -0.01284800 | C              | -0.91562800 | -0.88440500 | -0.01924100 |
| C              | 1.45074900  | 0.30002700  | -0.43725400 | C              | 1.68222800  | 0.30477900  | -0.04190300 | C              | -2.12844200 | -0.29724700 | 0.10974700  |
| O              | 1.37270100  | 2.65941600  | -0.61979800 | O              | 2.11115200  | 2.62999400  | -0.08321300 | O              | -3.28524600 | 1.76778300  | 0.23303300  |
| O              | -1.36345300 | 2.65763900  | -0.73174400 | O              | -0.55456800 | 3.25609800  | 0.10216400  | O              | -0.96092400 | 3.20800000  | 0.09016200  |
| Cl             | -3.18604300 | 0.35574900  | -0.40491700 | Cl             | -2.84758800 | 1.32049000  | 0.15954900  | Cl             | 1.80039000  | 2.15311000  | -0.31819200 |
| Cl             | -1.56269600 | -2.35154200 | -0.13007700 | Cl             | -1.55379500 | -1.43767300 | -1.71951100 | Cl             | 4.71665800  | -0.64714600 | 0.80317500  |
| Cl             | 1.53305900  | -2.36712600 | -0.18675100 | Cl             | 1.14698400  | -2.34138200 | 0.06703400  | Cl             | -0.74260800 | -2.60643500 | 0.04761000  |
| Cl             | 3.17743800  | 0.32906600  | -0.43787900 | Cl             | 3.36736600  | -0.04311800 | -0.06832300 | Cl             | -3.59542900 | -1.18188500 | 0.29419200  |
| H              | 0.65443900  | 1.86683200  | 2.65872700  | H              | -1.75232300 | -2.15723800 | 0.23521900  | H              | 3.51875400  | -0.48301000 | 0.34666600  |
| O              | -0.06892900 | 1.36799200  | 2.25034000  | O              | -1.59614100 | -1.38296000 | 0.84588000  | O              | 1.50715500  | -0.78856800 | -0.27276500 |
| O              | 0.15971000  | 0.04048900  | 2.78533800  | O              | -1.16277700 | -1.77000300 | 2.16533400  | O              | 1.60736000  | -1.35139300 | -1.63350100 |
| H              | -0.64367800 | -0.08472000 | 3.31134300  | H              | -0.30199300 | -2.20132300 | 1.99026300  | H              | 1.58000500  | -2.30091100 | -1.43016700 |
| <b>MC4'</b>    |             |             |             | <b>TS4'</b>    |             |             |             | <b>IM4'</b>    |             |             |             |
| C              | 0.77815600  | 1.61790200  | -0.57710800 | C              | -1.24376000 | 1.75614500  | 0.07723700  | C              | -2.47204300 | 0.16209700  | 0.33613800  |
| C              | -0.77916700 | 1.61420600  | -0.54539800 | C              | 0.28629700  | 2.05488900  | 0.00299600  | C              | -1.77764600 | 1.56645400  | 0.31553500  |
| C              | -1.45093300 | 0.30041300  | -0.43696100 | C              | 1.17044600  | 0.90685700  | -0.05688500 | C              | -0.33437800 | 1.60082200  | -0.03030600 |
| C              | -0.73106700 | -0.84197500 | -0.32551600 | C              | 0.68078500  | -0.36175100 | 0.07336900  | C              | 0.33470200  | 0.45154700  | -0.28139400 |
| C              | 0.74852100  | -0.83446500 | -0.30961900 | C              | -0.76446900 | -0.66457500 | -0.02717800 | C              | -0.31301800 | -0.87580100 | -0.23607500 |
| C              | 1.46038600  | 0.31209500  | -0.42540100 | C              | -1.67750600 | 0.32528700  | 0.01862200  | C              | -1.63062400 | -1.02238600 | 0.04637700  |
| O              | 1.36297100  | 2.65840200  | -0.73107100 | O              | -2.03158500 | 2.65983700  | 0.15530300  | O              | -3.64664500 | 0.10120800  | 0.58981000  |
| O              | -1.37310300 | 2.65993600  | -0.61795300 | O              | 0.65211800  | 3.20893400  | -0.01195500 | O              | -2.42276400 | 2.55089400  | 0.55903200  |
| Cl             | -3.17760100 | 0.32929300  | -0.43726400 | Cl             | 2.88457800  | 1.19374600  | -0.12094000 | Cl             | 0.42651900  | 3.14421100  | -0.11640800 |
| Cl             | -1.53283000 | -2.36688200 | -0.18785000 | Cl             | 1.38808500  | -1.52755200 | 1.77020500  | Cl             | 4.30666500  | -0.70447200 | 1.21344000  |
| Cl             | 1.56294200  | -2.35095400 | -0.13146400 | Cl             | -1.22314100 | -2.32905500 | -0.18175600 | Cl             | 0.71042300  | -2.22898500 | -0.53270000 |
| Cl             | 3.18587600  | 0.35668900  | -0.40464900 | Cl             | -3.37509600 | 0.03520200  | -0.00917000 | Cl             | -2.41466900 | -2.55541600 | 0.10922400  |
| H              | 0.64592400  | -0.08812800 | 3.30984500  | H              | 1.39963600  | -2.30496500 | -0.36728200 | H              | 3.28654200  | -0.35031000 | 0.50220200  |
| O              | -0.15756600 | 0.03619700  | 2.78377300  | O              | 1.56370300  | -1.41058500 | -0.75886200 | O              | 1.67971100  | 0.50224600  | -0.51729400 |
| O              | 0.06805400  | 1.36535000  | 2.25154700  | O              | 1.24701100  | -1.48214700 | -2.18694100 | O              | 1.91436100  | 0.30848600  | -1.96274000 |
| H              | -0.65674700 | 1.86150500  | 2.66066300  | H              | 1.97437300  | -0.93425900 | -2.53379800 | H              | 2.18222300  | 1.21048100  | -2.20476300 |
| <b>TS1-PCM</b> |             |             |             | <b>TS2-PCM</b> |             |             |             | <b>TS3-PCM</b> |             |             |             |
| C              | -0.93810200 | -1.73866700 | -0.00063300 | C              | 0.87919000  | -1.74526200 | 0.08477400  | C              | -1.08046100 | -1.70778600 | 0.09060700  |
| C              | 0.60377000  | -1.57281300 | 0.14514000  | C              | -0.65292200 | -1.51217100 | -0.10245800 | C              | 0.48155400  | -1.66569100 | 0.21147700  |
| C              | 1.17957900  | -0.20932900 | -0.08346900 | C              | -1.16187600 | -0.13406600 | 0.10204600  | C              | 1.14193300  | -0.34934300 | -0.04899000 |
| C              | 0.36494300  | 0.88471500  | 0.03941800  | C              | -0.30672700 | 0.91559600  | -0.06729000 | C              | 0.39855100  | 0.79410700  | 0.00830100  |
| C              | -1.06959500 | 0.70909200  | 0.02875400  | C              | 1.13062100  | 0.68310100  | -0.07352700 | C              | -1.05210300 | 0.73779300  | -0.00742700 |
| C              | -1.69954500 | -0.51679600 | -0.00480400 | C              | 1.70453600  | -0.56062600 | 0.02082900  | C              | -1.76315200 | -0.43404100 | 0.02251900  |
| O              | -1.38021600 | -2.87163400 | -0.05465400 | O              | 1.26434300  | -2.88953900 | 0.21267700  | O              | -1.61039100 | -2.80003800 | 0.09662500  |
| O              | 1.30184300  | -2.49760600 | 0.47328700  | O              | -1.36543600 | -2.41539200 | -0.47245700 | O              | 1.08398200  | -2.65423700 | 0.52971800  |
| Cl             | 2.36553500  | -0.39047100 | -1.77518600 | Cl             | -2.38927600 | -0.16872100 | 1.79287200  | Cl             | 2.39523900  | -0.64733600 | -1.71732700 |
| Cl             | 1.08305200  | 2.47044600  | -0.03743200 | Cl             | -0.94604300 | 2.53058400  | -0.04468200 | Cl             | 1.23481300  | 2.32344800  | -0.11119400 |
| Cl             | -2.02911700 | 2.14466600  | 0.03133200  | Cl             | 2.14404400  | 2.07563800  | -0.16295700 | Cl             | -1.89243400 | 2.24246700  | -0.09028900 |
| Cl             | -3.43235500 | -0.68326900 | -0.05384100 | Cl             | 3.42406200  | -0.80810200 | 0.07673100  | Cl             | -3.50045400 | -0.48481400 | -0.02258200 |

|                 |             |             |             |                 |             |             |             |                 |             |             |             |
|-----------------|-------------|-------------|-------------|-----------------|-------------|-------------|-------------|-----------------|-------------|-------------|-------------|
| H               | 3.06490800  | -0.91739000 | 0.59129600  | H               | -3.30553700 | -0.41673400 | -0.30477100 | H               | 3.26690400  | 0.05624200  | 0.32390800  |
| O               | 2.54330100  | -0.10282300 | 0.78909200  | O               | -2.57457500 | 0.02692200  | -0.79817900 | O               | 2.52301400  | -0.31889900 | 0.85350600  |
| O               | 2.27763800  | -0.19261100 | 2.21246200  | O               | -2.55065400 | -0.44175500 | -2.15324100 | O               | 2.46502600  | 0.28535500  | 2.15243700  |
| H               | 2.56731600  | 0.69424600  | 2.49790700  | H               | -2.39820800 | -1.40438100 | -2.04526100 | H               | 2.25033100  | 1.22208900  | 1.96254900  |
| <b>TS4-PCM</b>  |             |             |             | <b>TS1'-PCM</b> |             |             |             | <b>TS2'-PCM</b> |             |             |             |
| C               | -1.04201200 | -1.71761900 | 0.04249300  | C               | 1.21387500  | 1.73935700  | -0.06214400 | C               | -1.24408900 | 1.72384300  | 0.07398600  |
| C               | 0.51834000  | -1.64378000 | 0.17240400  | C               | -0.31923700 | 2.00479100  | -0.02329800 | C               | 0.28733000  | 2.00190700  | 0.04984600  |
| C               | 1.14789600  | -0.31275900 | -0.05741700 | C               | -1.16398100 | 0.85403400  | 0.05311500  | C               | 1.13922900  | 0.85588200  | -0.03525200 |
| C               | 0.38602500  | 0.81673400  | 0.01269300  | C               | -0.65244800 | -0.42024100 | -0.03983500 | C               | 0.64119600  | -0.42425500 | 0.04468600  |
| C               | -1.06419300 | 0.72896600  | 0.00345400  | C               | 0.80292800  | -0.69029200 | 0.05957800  | C               | -0.81263500 | -0.70177400 | -0.08099200 |
| C               | -1.75162500 | -0.45742400 | 0.00843900  | C               | 1.68382400  | 0.32983000  | 0.00927300  | C               | -1.70075700 | 0.31248200  | -0.02821500 |
| O               | -1.54773800 | -2.82103300 | 0.01542900  | O               | 1.97726700  | 2.67090000  | -0.13708400 | O               | -2.01397500 | 2.64883300  | 0.15985600  |
| O               | 1.13954600  | -2.62654800 | 0.47756300  | O               | -0.70462300 | 3.16402900  | -0.04957500 | O               | 0.66632100  | 3.16138200  | 0.09401000  |
| Cl              | 2.43035400  | -0.53783400 | -1.73293300 | Cl              | -2.89228500 | 1.08327500  | 0.07332800  | Cl              | 2.87075500  | 1.09943200  | -0.05546600 |
| Cl              | 1.18506300  | 2.35968600  | -0.09157100 | Cl              | -1.31358600 | -1.50246600 | -1.79400000 | Cl              | 1.27487600  | -1.52369300 | 1.78923000  |
| Cl              | -1.93746500 | 2.21703100  | -0.03940900 | Cl              | 1.30607100  | -2.33104300 | 0.20457600  | Cl              | -1.30240200 | -2.34147200 | -0.26219700 |
| Cl              | -3.48778500 | -0.54331900 | -0.03362200 | Cl              | 3.39134700  | 0.08808200  | 0.03858600  | Cl              | -3.40595800 | 0.05985300  | -0.08933000 |
| H               | 3.17447300  | 0.32397100  | 0.39408200  | H               | -2.33308800 | -1.59439200 | 0.38997800  | H               | 2.22878100  | -1.79584200 | -0.27013400 |
| O               | 2.53719000  | -0.27638200 | 0.84350000  | O               | -1.43109000 | -1.49761000 | 0.78101700  | O               | 1.44208800  | -1.48312100 | -0.78520100 |
| O               | 2.35583300  | 0.26129100  | 2.17169800  | O               | -1.62318900 | -1.11277500 | 2.17221500  | O               | 1.78970500  | -1.13191000 | -2.13764900 |
| H               | 2.54745500  | -0.53187000 | 2.70609200  | H               | -1.15990100 | -1.85026900 | 2.61496800  | H               | 2.40285500  | -0.37417900 | -2.02037600 |
| <b>TS3'-PCM</b> |             |             |             | <b>TS4'-PCM</b> |             |             |             |                 |             |             |             |
| C               | 1.16343600  | 1.78159200  | -0.04476200 | C               | 1.13629500  | 1.78697000  | -0.05898500 |                 |             |             |             |
| C               | -0.37144700 | 2.02288700  | 0.04345500  | C               | -0.40249900 | 2.00881800  | 0.00782400  |                 |             |             |             |
| C               | -1.20779400 | 0.86176500  | 0.09330700  | C               | -1.22009100 | 0.83741100  | 0.07921600  |                 |             |             |             |
| C               | -0.68356600 | -0.40254600 | -0.05884400 | C               | -0.67836400 | -0.42327700 | -0.05018200 |                 |             |             |             |
| C               | 0.77953700  | -0.64782200 | 0.01134600  | C               | 0.78980300  | -0.64893700 | 0.02506400  |                 |             |             |             |
| C               | 1.65369900  | 0.37532600  | -0.02473000 | C               | 1.64581400  | 0.38954500  | -0.01806800 |                 |             |             |             |
| O               | 1.91508600  | 2.72232700  | -0.10984200 | O               | 1.87454500  | 2.73870500  | -0.12793200 |                 |             |             |             |
| O               | -0.76690000 | 3.17887500  | 0.06709600  | O               | -0.81478200 | 3.15960900  | 0.00544500  |                 |             |             |             |
| Cl              | -2.93325600 | 1.09249000  | 0.13657000  | Cl              | -2.95072100 | 1.03971800  | 0.12412300  |                 |             |             |             |
| Cl              | -1.34345500 | -1.46201500 | -1.78616600 | Cl              | -1.31500200 | -1.51334800 | -1.77900600 |                 |             |             |             |
| Cl              | 1.29731100  | -2.29405200 | 0.13241600  | Cl              | 1.33152000  | -2.28382200 | 0.14243100  |                 |             |             |             |
| Cl              | 3.36132200  | 0.14838900  | -0.02517600 | Cl              | 3.35847200  | 0.18902300  | -0.01178200 |                 |             |             |             |
| H               | -1.50027400 | -2.35642000 | 0.35525800  | H               | -1.30728400 | -2.38311600 | 0.44664000  |                 |             |             |             |
| O               | -1.49865600 | -1.46406800 | 0.78378700  | O               | -1.46463900 | -1.47309400 | 0.79903900  |                 |             |             |             |
| O               | -1.22888800 | -1.54213800 | 2.19655000  | O               | -1.05376700 | -1.49002200 | 2.19137700  |                 |             |             |             |
| H               | -0.36070400 | -1.99257100 | 2.24541800  | H               | -1.86188500 | -1.13838200 | 2.61269900  |                 |             |             |             |
| <b>MC(0w)</b>   |             |             |             | <b>TSI(0w)</b>  |             |             |             | <b>IM(0w)</b>   |             |             |             |
| C               | 0.77840200  | 1.61737300  | -0.57766300 | C               | -1.33719200 | 1.69650500  | 0.08149600  | C               | -2.47167600 | 0.16345800  | 0.33669800  |
| C               | -0.77892100 | 1.61372300  | -0.54625600 | C               | 0.18722700  | 2.02843400  | 0.06857400  | C               | -1.77661800 | 1.56744500  | 0.31496700  |
| C               | -1.45075200 | 0.29999200  | -0.43724900 | C               | 1.08155100  | 0.89452700  | -0.01664400 | C               | -0.33322000 | 1.60081600  | -0.03059400 |
| C               | -0.73096000 | -0.84238900 | -0.32534200 | C               | 0.62357900  | -0.39109400 | 0.04531400  | C               | 0.33504700  | 0.45103200  | -0.28153800 |
| C               | 0.74864300  | -0.83488200 | -0.30918500 | C               | -0.81248100 | -0.72169000 | -0.08354600 | C               | -0.31354400 | -0.87586400 | -0.23639600 |

|                |             |             |             |                |             |             |             |                |             |             |             |
|----------------|-------------|-------------|-------------|----------------|-------------|-------------|-------------|----------------|-------------|-------------|-------------|
| C              | 1.46056100  | 0.31159200  | -0.42554700 | C              | -1.73830300 | 0.26024200  | -0.02899000 | C              | -1.63117900 | -1.02154400 | 0.04645700  |
| O              | 1.36327100  | 2.65783900  | -0.73168800 | O              | -2.14204500 | 2.58494100  | 0.16178300  | O              | -3.64607800 | 0.10323700  | 0.59151000  |
| O              | -1.37283900 | 2.65941300  | -0.61954300 | O              | 0.54081300  | 3.18502700  | 0.11924400  | O              | -2.42131300 | 2.55242300  | 0.55737000  |
| Cl             | -3.17740400 | 0.32889400  | -0.43794700 | Cl             | 2.80697600  | 1.20467900  | -0.01333500 | Cl             | 0.42868800  | 3.14365600  | -0.11674300 |
| Cl             | -1.53277200 | -2.36720500 | -0.18726000 | Cl             | 1.37491800  | -1.56222700 | 1.72199900  | Cl             | 4.30537600  | -0.70544700 | 1.21434800  |
| Cl             | 1.56295100  | -2.35131800 | -0.13001800 | Cl             | -1.24225200 | -2.38022900 | -0.27481400 | Cl             | 0.70881400  | -2.22971000 | -0.53353600 |
| Cl             | 3.18606500  | 0.35609900  | -0.40486300 | Cl             | -3.42990500 | -0.05368600 | -0.09982400 | Cl             | -2.41621200 | -2.55407600 | 0.10953500  |
| H              | 0.64380500  | -0.08508900 | 3.31122400  | H              | 2.18931200  | -1.76405700 | -0.19095900 | H              | 3.28618500  | -0.35233900 | 0.50118300  |
| O              | -0.15976300 | 0.03979300  | 2.78540500  | O              | 1.49651500  | -1.43612400 | -0.83227100 | O              | 1.68020900  | 0.50087900  | -0.51716800 |
| O              | 0.06805700  | 1.36756400  | 2.25065700  | O              | 2.05123400  | -0.98424900 | -2.08307500 | O              | 1.91522200  | 0.30676700  | -1.96238800 |
| H              | -0.65573300 | 1.86577700  | 2.65906200  | H              | 2.54675800  | -0.17936900 | -1.81013200 | H              | 2.18330100  | 1.20864100  | -2.20461600 |
| <b>TS2(0w)</b> |             |             |             | <b>Pro(0w)</b> |             |             |             | <b>MC(1w)</b>  |             |             |             |
| C              | 2.46487300  | -0.05615200 | 0.23583900  | C              | 2.41235500  | -0.17748400 | 0.00008700  | C              | 0.84162000  | 1.09451700  | 0.77822200  |
| C              | 1.94178600  | 1.40202500  | 0.08826700  | C              | 2.01389200  | 1.32146300  | 0.00006800  | C              | 1.13407800  | -0.42414100 | 0.94461700  |
| C              | 0.50912400  | 1.57778000  | -0.27902100 | C              | 0.58930900  | 1.62486800  | -0.00007800 | C              | 0.06529900  | -1.36766500 | 0.56178500  |
| C              | -0.36433000 | 0.46014000  | -0.44099500 | C              | -0.45239300 | 0.58871600  | -0.00014300 | C              | -1.14397000 | -0.90862700 | 0.15653300  |
| C              | 0.20599500  | -0.91783200 | -0.31038800 | C              | 0.00686300  | -0.83990800 | -0.00012900 | C              | -1.44272900 | 0.53857000  | 0.06782500  |
| C              | 1.50669700  | -1.16101200 | -0.01314600 | C              | 1.31677800  | -1.19456400 | 0.00002300  | C              | -0.51584100 | 1.48481100  | 0.36060500  |
| O              | 3.61730300  | -0.22754600 | 0.53221600  | O              | 3.57467000  | -0.48054700 | 0.00012700  | O              | 1.72165300  | 1.88951800  | 1.01651500  |
| O              | 2.68590000  | 2.33145600  | 0.25879800  | O              | 2.88290200  | 2.16713800  | 0.00016600  | O              | 2.20043100  | -0.76563600 | 1.39371600  |
| Cl             | -0.05917300 | 3.13234200  | -0.53800900 | Cl             | 0.09780100  | 3.24299900  | -0.00007700 | Cl             | 0.44613900  | -3.04245600 | 0.68765000  |
| Cl             | -4.58127700 | -0.53249000 | 0.30319400  | Cl             | -4.80653500 | -0.09753100 | 0.00026700  | Cl             | -2.39483300 | -2.02009400 | -0.27613700 |
| Cl             | -0.92356200 | -2.17864600 | -0.57700300 | Cl             | -1.25879500 | -1.99917300 | -0.00028100 | Cl             | -3.02838500 | 1.00649000  | -0.43291900 |
| Cl             | 2.15147400  | -2.75121400 | 0.11687000  | Cl             | 1.83027600  | -2.83283400 | 0.00011200  | Cl             | -0.82591700 | 3.17814500  | 0.25400500  |
| H              | -3.39784300 | -0.14410800 | -0.05363100 | H              | -3.55606100 | 0.24179100  | 0.00005400  | H              | 2.65531700  | 0.52861800  | -1.45104600 |
| O              | -1.58236900 | 0.64580000  | -0.57683200 | O              | -1.63650500 | 0.87476300  | -0.00021800 | O              | 1.73441600  | 0.35417100  | -1.76704500 |
| O              | -1.47152200 | 1.09614000  | 1.53272100  |                |             |             |             | O              | 1.85127700  | -0.99549100 | -2.28659300 |
| H              | -2.16837800 | 1.15776200  | 2.20919800  |                |             |             |             | H              | 1.70319800  | -0.84197700 | -3.22998900 |
|                |             |             |             |                |             |             |             | O              | 4.05985300  | 0.92890600  | -0.44486100 |
|                |             |             |             |                |             |             |             | H              | 4.51297400  | 0.14486000  | -0.11591400 |
|                |             |             |             |                |             |             |             | H              | 3.60765200  | 1.29651200  | 0.33139400  |
| <b>TS1(1w)</b> |             |             |             | <b>IM(1w)</b>  |             |             |             | <b>TS2(1w)</b> |             |             |             |
| C              | 1.84014800  | 1.46837700  | -0.05886700 | C              | -1.82633100 | 1.30864400  | 0.12743900  | C              | 2.22753200  | 0.53802000  | -0.49026700 |
| C              | 0.40865200  | 2.08157800  | -0.02661300 | C              | -0.48799500 | 2.11933700  | 0.06394600  | C              | 1.29486800  | 1.78239200  | -0.46315700 |
| C              | -0.67271800 | 1.14342100  | 0.09045900  | C              | 0.71830300  | 1.39175700  | -0.40309200 | C              | -0.08248800 | 1.58987400  | 0.06992300  |
| C              | -0.50455900 | -0.23662700 | -0.06038800 | C              | 0.64220900  | 0.08026400  | -0.72375700 | C              | -0.51928400 | 0.33168300  | 0.58152800  |
| C              | 0.87335800  | -0.81292800 | 0.04134200  | C              | -0.61430600 | -0.69050900 | -0.64628900 | C              | 0.42807100  | -0.82538800 | 0.53112400  |
| C              | 1.96299600  | -0.02171100 | 0.00049600  | C              | -1.77963300 | -0.12241900 | -0.25392100 | C              | 1.68362400  | -0.74090600 | 0.02558900  |
| O              | 2.80364000  | 2.18493900  | -0.11518300 | O              | -2.82891400 | 1.87362300  | 0.47845700  | O              | 3.34120000  | 0.66243200  | -0.92635500 |
| O              | 0.29332600  | 3.28960900  | -0.08120700 | O              | -0.48177700 | 3.28241600  | 0.36653800  | O              | 1.69058800  | 2.84478000  | -0.86503500 |
| Cl             | -2.30445200 | 1.82288700  | 0.00683500  | Cl             | 2.18904800  | 2.28393500  | -0.52224800 | Cl             | -1.14250900 | 2.88487400  | 0.00772100  |
| Cl             | -1.29832600 | -1.04933200 | -1.77420700 | Cl             | 0.76558600  | -0.69212900 | 3.01458500  | Cl             | -2.08717600 | -0.99932600 | -2.44733300 |
| Cl             | 0.99145200  | -2.52903400 | 0.18809400  | Cl             | -0.50727500 | -2.36319700 | -1.04711600 | Cl             | -0.20638600 | -2.28901900 | 1.15599200  |
| Cl             | 3.56876700  | -0.65021700 | 0.04065900  | Cl             | -3.26125400 | -0.99398100 | -0.14532000 | Cl             | 2.75124100  | -2.08833100 | -0.04678200 |

|                |             |             |             |                |             |             |             |                |             |             |             |
|----------------|-------------|-------------|-------------|----------------|-------------|-------------|-------------|----------------|-------------|-------------|-------------|
| H              | -2.53263400 | -1.02968400 | 0.53153800  | H              | 2.57179500  | -1.94997300 | 0.28104200  | H              | -3.16448100 | -0.97506700 | 0.77267500  |
| O              | -1.44547500 | -1.05716000 | 0.82261900  | O              | 1.79217600  | -0.58783400 | -1.04898100 | O              | -1.62291800 | 0.23905900  | 1.13952600  |
| O              | -1.36603800 | -0.64289300 | 2.20750400  | O              | 1.81235000  | -0.84220400 | -2.50211600 | O              | -0.58324200 | 1.22849400  | 2.75627800  |
| H              | -1.17910700 | 0.31790000  | 2.10484400  | H              | 2.42078200  | -0.13881400 | -2.78358900 | H              | -0.79941900 | 1.29395300  | 3.70210600  |
| O              | -3.79561000 | -1.09331000 | 0.18605700  | O              | 2.67024400  | -2.30823200 | 1.17496000  | O              | -3.71554500 | -1.43839400 | 0.12280900  |
| H              | -3.77853200 | -1.38113000 | -0.74105800 | H              | 1.60203000  | -1.42798200 | 2.31204900  | H              | -2.86934400 | -1.23877300 | -1.40752800 |
| H              | -4.15220400 | -0.19239200 | 0.18431500  | H              | 3.61549800  | -2.33649800 | 1.35534700  | H              | -4.59926800 | -1.06449400 | 0.20336800  |
| <b>Pro(1w)</b> |             |             |             | <b>MC(2w)</b>  |             |             |             | <b>TS1(2w)</b> |             |             |             |
| C              | -1.93390700 | 0.99426900  | 0.34314300  | C              | -0.77728900 | 0.92119700  | -0.86672500 | C              | 2.45898700  | 1.00867300  | -0.12610200 |
| C              | -0.80351500 | 2.02592300  | 0.09329800  | C              | -0.85597100 | -0.62479300 | -1.00630500 | C              | 1.24145300  | 1.97619600  | -0.15623300 |
| C              | 0.41850700  | 1.52773400  | -0.52251000 | C              | 0.32759300  | -1.40426500 | -0.60252500 | C              | -0.04430200 | 1.35958300  | -0.05534200 |
| C              | 0.61013600  | 0.12374600  | -0.90285100 | C              | 1.46295600  | -0.77725500 | -0.20914800 | C              | -0.26889300 | -0.03285400 | -0.11861900 |
| C              | -0.53458100 | -0.81137600 | -0.65554500 | C              | 1.56023200  | 0.69765200  | -0.14721600 | C              | 0.92632300  | -0.94175200 | -0.03652800 |
| C              | -1.69998100 | -0.41849800 | -0.08384800 | C              | 0.51309000  | 1.50178700  | -0.45602200 | C              | 2.18350700  | -0.46332800 | -0.06401800 |
| O              | -2.95797800 | 1.35202600  | 0.85932800  | O              | -1.75269300 | 1.58606600  | -1.13351700 | O              | 3.58128800  | 1.43936200  | -0.14553000 |
| O              | -0.97563800 | 3.18420900  | 0.40766900  | O              | -1.85877700 | -1.11845700 | -1.46402000 | O              | 1.45752300  | 3.17025800  | -0.25673500 |
| Cl             | 1.68694000  | 2.60990400  | -0.80928900 | Cl             | 0.17600100  | -3.11848300 | -0.68734500 | Cl             | -1.43678400 | 2.44716100  | -0.23135400 |
| Cl             | 1.82725100  | -0.71148900 | 2.35605100  | Cl             | 2.85222800  | -1.69920800 | 0.24120300  | Cl             | -1.41168200 | -0.63532700 | -1.48655700 |
| Cl             | -0.25578100 | -2.43218500 | -1.14968200 | Cl             | 3.06449900  | 1.38865800  | 0.35081800  | Cl             | 0.60227700  | -2.63563700 | 0.10878300  |
| Cl             | -3.00094000 | -1.50171900 | 0.20177400  | Cl             | 0.58475700  | 3.22294900  | -0.37430200 | Cl             | 3.57041700  | -1.48987800 | 0.00167300  |
| H              | 3.00343200  | -1.54108300 | -0.69417000 | H              | -2.15605100 | -0.00105000 | 1.88081700  | H              | -2.37096000 | -0.10376100 | 1.05508300  |
| O              | 1.65078600  | -0.27058800 | -1.40274900 | O              | -1.20790800 | 0.25462000  | 1.72182700  | O              | -1.23546300 | -0.51048400 | 1.11335100  |
| O              | 3.44456000  | -1.94758800 | 0.06822800  | O              | -0.46408000 | -0.71166600 | 2.50152800  | O              | -0.70830800 | 0.00937400  | 2.34156000  |
| H              | 2.60207000  | -1.29240200 | 1.45200500  | H              | -0.13843600 | -0.15718500 | 3.22429100  | H              | -0.33917100 | 0.87287800  | 2.03720400  |
| H              | 4.38371500  | -1.75845300 | -0.02828400 | O              | -3.83834000 | -0.21197200 | 1.84170700  | O              | -3.50846400 | 0.29238300  | 1.01905300  |
|                |             |             |             | H              | -4.15719500 | -0.00441800 | 0.93231100  | H              | -4.05507200 | -0.31017100 | 0.44349100  |
|                |             |             |             | H              | -4.43795500 | 0.22511100  | 2.45295600  | H              | -3.46769000 | 1.16787300  | 0.60192700  |
|                |             |             |             | O              | -4.39066600 | 0.34847800  | -0.77523400 | O              | -4.79015600 | -1.38510400 | -0.56955600 |
|                |             |             |             | H              | -4.30606300 | -0.47477400 | -1.26989700 | H              | -4.18673100 | -1.82120700 | -1.18334800 |
|                |             |             |             | H              | -3.60548500 | 0.85325300  | -1.04751800 | H              | -5.44607500 | -2.03846700 | -0.30371500 |
| <b>IM(2w)</b>  |             |             |             | <b>TS2(2w)</b> |             |             |             | <b>Pro(2w)</b> |             |             |             |
| C              | 2.22176500  | 0.24885400  | 0.26216700  | C              | -1.91464800 | 1.31684100  | -0.31258100 | C              | 2.01513000  | -1.21749300 | 0.17188600  |
| C              | 1.49689500  | 1.62829500  | 0.12070800  | C              | -0.55755400 | 1.67287000  | -0.98038500 | C              | 0.74498900  | -1.97082400 | -0.30069700 |
| C              | 0.03909800  | 1.65503400  | 0.40935100  | C              | 0.50522600  | 0.62627200  | -0.95870700 | C              | -0.34140800 | -1.15792800 | -0.83088600 |
| C              | -0.60591600 | 0.52604300  | 0.78025400  | C              | 0.24152500  | -0.69822000 | -0.49281100 | C              | -0.25786300 | 0.29875300  | -0.97151000 |
| C              | 0.07481500  | -0.77539000 | 0.90703300  | C              | -1.12115200 | -1.00400800 | 0.04023800  | C              | 1.02389900  | 0.95169100  | -0.55376900 |
| C              | 1.39695500  | -0.92065200 | 0.65620200  | C              | -2.10778300 | -0.08050700 | 0.14473300  | C              | 2.06652000  | 0.26262700  | -0.02834600 |
| O              | 3.40746300  | 0.19167200  | 0.07161400  | O              | -2.75114000 | 2.17443000  | -0.21048200 | O              | 2.91970000  | -1.83395900 | 0.66661300  |
| O              | 2.12867700  | 2.60817200  | -0.16847100 | O              | -0.39901400 | 2.74301000  | -1.50335500 | O              | 0.70597800  | -3.17933300 | -0.22354400 |
| Cl             | -0.76723300 | 3.17326200  | 0.28529600  | Cl             | 2.02282500  | 1.03908800  | -1.53722400 | Cl             | -1.76122300 | -1.92982400 | -1.33922700 |
| Cl             | 0.63236000  | 0.16084900  | -2.88230400 | Cl             | 0.93802700  | 1.55193700  | 2.14745100  | Cl             | -1.10821600 | -0.17904100 | 2.39863700  |
| Cl             | -0.92144200 | -2.11590100 | 1.34849200  | Cl             | -1.33126200 | -2.62600400 | 0.55721200  | Cl             | 1.06788000  | 2.65412000  | -0.77752700 |
| Cl             | 2.21758700  | -2.43082400 | 0.77582300  | Cl             | -3.65422400 | -0.43900500 | 0.81130100  | Cl             | 3.52479000  | 1.02432200  | 0.46488100  |
| H              | -3.24401200 | -0.49301100 | -0.17563000 | H              | 2.94555600  | -1.78441800 | -0.21029400 | H              | -3.04291100 | 1.32465000  | -1.21008400 |

|                |             |             |             |                |             |             |             |               |             |             |             |
|----------------|-------------|-------------|-------------|----------------|-------------|-------------|-------------|---------------|-------------|-------------|-------------|
| O              | -1.96347200 | 0.56534600  | 0.96067100  | O              | 1.09155900  | -1.59368800 | -0.60687900 | O             | -1.17614500 | 0.96454700  | -1.42199500 |
| O              | -2.26302400 | 0.54925600  | 2.40715000  | O              | 0.48000800  | -1.57105000 | -2.68343400 | O             | -3.93114400 | 1.46180400  | -0.84146000 |
| H              | -2.44537600 | 1.49317100  | 2.54850700  | H              | 0.52571200  | -2.27000600 | -3.35721300 | H             | -3.95627200 | 1.01531900  | 0.85023300  |
| O              | -3.64003800 | -0.95116500 | -0.93188200 | O              | 3.78837100  | -1.71758400 | 0.26978800  | H             | -4.54746600 | 1.07833700  | -1.47273900 |
| H              | -2.46830900 | -1.43503400 | -2.18781400 | H              | 3.72063800  | -0.45427900 | 1.46736600  | O             | -3.85798000 | 0.73632200  | 1.78909400  |
| H              | -4.41340700 | -0.43725300 | -1.18482000 | H              | 4.48411000  | -1.77878000 | -0.39169000 | H             | -2.36674500 | 0.23564600  | 2.13694300  |
| O              | -1.77577100 | -1.64363100 | -2.84964000 | O              | 3.59447300  | 0.27186300  | 2.12156300  | H             | -4.17240000 | 1.46723600  | 2.33092700  |
| H              | -0.42913300 | -0.64906000 | -2.87771900 | H              | 2.15816800  | 0.96034000  | 2.13677400  |               |             |             |             |
| H              | -1.63374400 | -2.59468100 | -2.81655600 | H              | 3.87685000  | -0.07047700 | 2.97596000  |               |             |             |             |
| <b>MC(3w)</b>  |             |             |             | <b>TS1(3w)</b> |             |             |             | <b>IM(3w)</b> |             |             |             |
| C              | 0.74731200  | -0.83478400 | 1.85059500  | C              | 2.80972500  | 0.65284500  | 0.19319200  | C             | -2.36077100 | -1.27768500 | 0.56527000  |
| C              | 1.59540200  | 0.45580900  | 1.65349500  | C              | 1.82276400  | 1.84914800  | 0.09243200  | C             | -2.63844400 | 0.24464500  | 0.80706300  |
| C              | 1.99286300  | 0.80110700  | 0.26905100  | C              | 0.45399300  | 1.50715700  | -0.12222500 | C             | -1.73710400 | 1.20973700  | 0.12949500  |
| C              | 1.62131100  | 0.02691200  | -0.77869500 | C              | -0.02967100 | 0.20164200  | -0.34806800 | C             | -0.72395900 | 0.76489300  | -0.64626100 |
| C              | 0.80615300  | -1.19484500 | -0.59323200 | C              | 0.94717700  | -0.93207400 | -0.21733800 | C             | -0.47393300 | -0.66736200 | -0.89023800 |
| C              | 0.38497800  | -1.59224200 | 0.63168700  | C              | 2.25583100  | -0.73025700 | 0.01534000  | C             | -1.23294700 | -1.63572000 | -0.32686500 |
| O              | 0.43869700  | -1.17781600 | 2.96182300  | O              | 3.97712900  | 0.83694600  | 0.41359900  | O             | -3.07171000 | -2.08792500 | 1.09954300  |
| O              | 1.90205600  | 1.11430300  | 2.61435800  | O              | 2.27571600  | 2.97637200  | 0.19419200  | O             | -3.55945600 | 0.57818800  | 1.50328300  |
| Cl             | 2.92290200  | 2.24442600  | 0.08723600  | Cl             | -0.65073100 | 2.87080000  | -0.37488500 | Cl            | -2.03577300 | 2.88876400  | 0.37482900  |
| Cl             | 2.08918400  | 0.44994900  | -2.38631200 | Cl             | -1.12373600 | -0.04003900 | -1.81376900 | Cl            | 1.53016100  | 0.27886900  | 2.06977300  |
| Cl             | 0.39723200  | -2.11307600 | -1.99854200 | Cl             | 0.30569100  | -2.54177800 | -0.35341900 | Cl            | 0.85935900  | -1.04119900 | -1.92062100 |
| Cl             | -0.57594900 | -3.01108000 | 0.88043500  | Cl             | 3.39152300  | -2.02341300 | 0.15987200  | Cl            | -0.95593300 | -3.31722300 | -0.57888100 |
| H              | -2.20683600 | 2.05458600  | -0.40425800 | H              | -2.34795200 | 0.68291200  | 0.71377200  | H             | 2.02932200  | 1.86186900  | -0.59966500 |
| O              | -1.39231300 | 1.47709700  | -0.35480100 | O              | -1.23625300 | -0.15883100 | 0.77724700  | O             | 0.15926200  | 1.67069400  | -1.17482600 |
| O              | -1.09027100 | 1.46883400  | 1.06382300  | O              | -0.69951400 | 0.03959300  | 2.09311500  | O             | -0.18059100 | 1.92591400  | -2.58763000 |
| H              | -0.64298300 | 2.31984100  | 1.18852500  | H              | -0.19619800 | 0.87522100  | 1.97502000  | H             | -0.65010400 | 2.77182100  | -2.49432000 |
| O              | -3.64201100 | 2.89181200  | -0.45353200 | O              | -3.25230700 | 1.26617800  | 0.67465000  | O             | 2.69559300  | 1.85618600  | 0.10969000  |
| H              | -4.37035700 | 2.23798000  | -0.32618100 | H              | -4.05203800 | 0.63459900  | 0.44245500  | H             | 3.51273500  | 1.33874800  | -0.19098200 |
| H              | -3.88769200 | 3.43756100  | -1.20630600 | H              | -3.11036600 | 1.96397300  | 0.01618900  | H             | 2.21093000  | 1.24134100  | 0.98608900  |
| O              | -5.34440200 | 0.81068400  | -0.15629500 | O              | -4.99249800 | -0.45012600 | 0.18216600  | O             | 4.77817100  | 0.39461400  | -0.34636500 |
| H              | -5.81843600 | 0.63538900  | 0.66181900  | H              | -5.75468500 | -0.55558000 | 0.76130700  | H             | 5.03757200  | -0.04124900 | -1.16317300 |
| H              | -4.68681500 | 0.08981700  | -0.25811600 | H              | -4.45301400 | -1.28164500 | 0.23479500  | H             | 4.70767200  | -0.30300400 | 0.35261500  |
| O              | -3.14673100 | -0.79402000 | -0.56232700 | O              | -3.19406900 | -2.39529700 | 0.44793000  | O             | 4.21923200  | -1.33785700 | 1.62950300  |
| H              | -2.83072000 | -1.61141500 | -0.16415300 | H              | -3.01396300 | -3.09162500 | -0.19207200 | H             | 4.73089200  | -1.44015300 | 2.43809600  |
| H              | -2.41177200 | -0.15637100 | -0.50102900 | H              | -2.34303700 | -1.95196700 | 0.60272400  | H             | 3.33708500  | -1.01554000 | 1.90826200  |
| <b>TS2(3w)</b> |             |             |             | <b>Pro(3w)</b> |             |             |             | <b>OH-</b>    |             |             |             |
| C              | -2.13555300 | -0.34801500 | -1.04489200 | C              | 2.36317200  | -0.25466300 | 0.76413400  | O             | 0.00000000  | 0.00000000  | 0.10840800  |
| C              | -1.31049800 | -1.64666200 | -0.83750400 | C              | 1.73075900  | -1.62573700 | 0.41190300  | H             | 0.00000000  | 0.00000000  | -0.86726100 |
| C              | -0.14792500 | -1.56002900 | 0.09676400  | C              | 0.59929800  | -1.60568200 | -0.50763500 |               |             |             |             |
| C              | 0.05395000  | -0.41394900 | 0.93382700  | C              | 0.10468100  | -0.38321000 | -1.13256000 |               |             |             |             |
| C              | -0.92774400 | 0.70295500  | 0.84842300  | C              | 0.88284400  | 0.87121100  | -0.89219400 |               |             |             |             |
| C              | -1.91565800 | 0.75684200  | -0.07826300 | C              | 1.91166500  | 0.94076400  | -0.01455700 |               |             |             |             |
| O              | -2.94159300 | -0.30259900 | -1.93609700 | O              | 3.20980900  | -0.18734100 | 1.61307400  |               |             |             |             |
| O              | -1.63840900 | -2.66908400 | -1.37454100 | O              | 2.19907600  | -2.63618200 | 0.88516900  |               |             |             |             |

| Cl    | 0.77127700  | -2.95030600 | 0.33724400  | Cl                  | -0.12448400 | -3.08067300 | -0.93857500 |     |             |             |             |
|-------|-------------|-------------|-------------|---------------------|-------------|-------------|-------------|-----|-------------|-------------|-------------|
| Cl    | 1.33246200  | -0.40903900 | -1.98937100 | Cl                  | -1.35483100 | -0.63779500 | 1.71715600  |     |             |             |             |
| Cl    | -0.66079200 | 1.97886500  | 1.96929800  | Cl                  | 0.33540300  | 2.24266600  | -1.77741700 |     |             |             |             |
| Cl    | -2.98366500 | 2.10115800  | -0.22685800 | Cl                  | 2.76272100  | 2.39882300  | 0.30438600  |     |             |             |             |
| H     | 2.56847000  | -0.54821000 | 0.98478500  | H                   | -2.46980200 | -0.85906300 | -1.21810300 |     |             |             |             |
| O     | 1.01286500  | -0.35623800 | 1.72309700  | O                   | -0.89389900 | -0.36336300 | -1.84817300 |     |             |             |             |
| O     | -0.29167600 | -1.49023500 | 3.06721500  | O                   | -3.13744800 | -0.95018000 | -0.49503800 |     |             |             |             |
| H     | -0.25227800 | -1.57797800 | 4.03291000  | H                   | -3.71216000 | -0.08909600 | -0.44829200 |     |             |             |             |
| O     | 3.22371800  | -0.41102500 | 0.24851100  | H                   | -2.54964500 | -0.94929200 | 0.38223200  |     |             |             |             |
| H     | 3.54484100  | 0.58892400  | 0.26010100  | O                   | -4.46429100 | 1.17225600  | -0.13929000 |     |             |             |             |
| H     | 2.66957100  | -0.51670100 | -0.61080900 | H                   | -4.54276600 | 1.87501900  | -0.79181200 |     |             |             |             |
| O     | 3.90329200  | 1.99216700  | 0.08147800  | H                   | -4.07114500 | 1.56668200  | 0.68419300  |     |             |             |             |
| H     | 3.82613300  | 2.59974800  | 0.82428200  | O                   | -3.13453600 | 1.94233000  | 2.03424400  |     |             |             |             |
| H     | 3.36982900  | 2.36155100  | -0.67181300 | H                   | -3.50219500 | 2.05091200  | 2.91706900  |     |             |             |             |
| O     | 2.28544300  | 2.62404000  | -1.92982300 | H                   | -2.45625300 | 1.23722900  | 2.10592000  |     |             |             |             |
| H     | 2.50822500  | 3.01692600  | -2.77973700 |                     |             |             |             |     |             |             |             |
| H     | 1.82885500  | 1.78116800  | -2.12389700 |                     |             |             |             |     |             |             |             |
|       |             |             |             |                     |             |             |             |     |             |             |             |
|       |             |             |             |                     |             |             |             |     |             |             |             |
| Br-TS |             |             |             | CH <sub>2</sub> -TS |             |             |             | MC' |             |             |             |
| C     | 2.14240000  | 1.83193600  | 0.24318000  | C                   | 2.80427000  | 0.72269300  | -0.00173200 | C   | -0.77148000 | -1.63658600 | -0.41845900 |
| C     | 0.74422100  | 2.51308800  | 0.23012800  | C                   | 1.76706500  | 1.86562100  | -0.16895800 | C   | 0.75756800  | -1.64062000 | -0.41358400 |
| C     | -0.37579600 | 1.64033100  | 0.05007600  | C                   | 0.43045300  | 1.45126800  | -0.40846800 | C   | 1.41797500  | -0.31544800 | -0.31154700 |
| C     | -0.28321400 | 0.25978500  | -0.17365100 | C                   | -0.02063400 | 0.12169300  | -0.43866000 | C   | 0.72308100  | 0.84670300  | -0.23120200 |
| C     | 1.07385100  | -0.38112500 | -0.09052000 | C                   | 1.00625100  | -0.96128600 | -0.26865700 | C   | -0.73536900 | 0.84955700  | -0.22552700 |
| C     | 2.19613200  | 0.34333400  | 0.07530000  | C                   | 2.30932700  | -0.69094900 | -0.08454200 | C   | -1.43067700 | -0.31085400 | -0.30281300 |
| O     | 3.13422400  | 2.49325100  | 0.39660300  | O                   | 3.96489300  | 0.96865300  | 0.19681500  | O   | -1.39850200 | -2.66054500 | -0.61424500 |
| O     | 0.69992500  | 3.72387400  | 0.35102900  | O                   | 2.16644600  | 3.01896200  | -0.09766500 | O   | 1.38515500  | -2.66722500 | -0.60058500 |
| H     | -2.50655800 | -0.28174200 | 1.10458400  | Cl                  | -0.73377700 | 2.75919300  | -0.69972100 | Cl  | 3.16231900  | -0.34532900 | -0.30291900 |
| O     | -1.19843000 | -0.59491800 | 1.04777000  | Cl                  | -1.18622200 | -0.29057500 | -1.83934400 | Cl  | 1.55882200  | 2.38656600  | -0.15156500 |
| O     | -0.69251600 | -0.20986800 | 2.33355500  | Cl                  | 0.43407100  | -2.60322600 | -0.28265800 | Cl  | -1.56383500 | 2.38866700  | -0.12345700 |
| H     | -0.63702900 | 0.76434600  | 2.24642500  | Cl                  | 3.50519600  | -1.92424700 | 0.10815700  | Cl  | -3.16945500 | -0.34062200 | -0.28349000 |
| O     | -3.58581500 | -0.07125200 | 1.17579900  | H                   | -2.34948200 | 0.65336500  | 0.66120200  | H   | 0.91432100  | -0.03837900 | 2.53316900  |
| H     | -4.12052500 | -0.93291600 | 0.97860500  | O                   | -1.16876100 | -0.21882800 | 0.75122400  | O   | -0.02739400 | -0.21966100 | 2.39788200  |
| H     | -3.76405900 | 0.64691900  | 0.54576000  | O                   | -0.51587900 | -0.24592100 | 2.03780100  | O   | -0.01855700 | -1.48206000 | 1.75819100  |
| O     | -4.63255400 | -2.32071500 | 0.75736500  | O                   | -3.21630800 | 1.21609000  | 0.47674700  |     |             |             |             |
| H     | -5.24476000 | -2.70061900 | 1.39608700  | H                   | -3.96547600 | 0.55230300  | 0.13031800  |     |             |             |             |
| H     | -3.81803500 | -2.88381800 | 0.75141100  | H                   | -2.93700800 | 1.87129600  | -0.19019200 |     |             |             |             |
| O     | -2.19905800 | -3.43172600 | 0.84047900  | O                   | -4.81883100 | -0.53121900 | -0.23033400 |     |             |             |             |
| H     | -1.83066300 | -4.02958200 | 0.18205800  | H                   | -5.66324200 | -0.62895000 | 0.22233500  |     |             |             |             |
| H     | -1.56466200 | -2.69878600 | 0.91156200  | H                   | -4.28325100 | -1.35615800 | -0.06897000 |     |             |             |             |
| Br    | -1.35472900 | -0.49143700 | -1.71182100 | O                   | -3.08516700 | -2.43658100 | 0.37734500  |     |             |             |             |
| Br    | -2.06989500 | 2.55251800  | -0.13190200 | H                   | -2.85369700 | -3.16640400 | -0.20672800 |     |             |             |             |
| Br    | 1.15809500  | -2.28014700 | -0.18146300 | H                   | -2.25355000 | -1.95194400 | 0.52892800  |     |             |             |             |
| Br    | 3.93208700  | -0.40485000 | 0.15820400  | C                   | -0.70355700 | 0.99361100  | 2.73103000  |     |             |             |             |
|       |             |             |             | H                   | -0.14056200 | 0.85152400  | 3.65547900  |     |             |             |             |

|    |             |             |             |            |                |             |                |             |    |             |             |             |
|----|-------------|-------------|-------------|------------|----------------|-------------|----------------|-------------|----|-------------|-------------|-------------|
|    | H           | -0.29251800 | 1.83461500  | 2.17239200 |                |             |                |             |    |             |             |             |
|    | H           | -1.75897700 | 1.15574100  | 2.97031600 |                |             |                |             |    |             |             |             |
|    | <b>TS'</b>  |             |             |            | <b>MC'-PCM</b> |             | <b>TS'-PCM</b> |             |    |             |             |             |
| C  | -0.86314600 | -1.71774500 | -0.23161500 |            | C              | -0.76624800 | -1.59923600    | -0.44211700 | C  | -0.87737300 | -1.69972900 | -0.23983300 |
| C  | 0.67112100  | -1.66426300 | -0.43028000 |            | C              | 0.75824600  | -1.60428200    | -0.42012400 | C  | 0.65157100  | -1.64855500 | -0.43578600 |
| C  | 1.32376100  | -0.33150400 | -0.24578300 |            | C              | 1.42708800  | -0.29125400    | -0.31310800 | C  | 1.32207200  | -0.32689100 | -0.21006900 |
| C  | 0.57654500  | 0.83411800  | -0.31934500 |            | C              | 0.73036000  | 0.86822100     | -0.21772500 | C  | 0.57323800  | 0.85018300  | -0.29147900 |
| C  | -0.84341800 | 0.75390900  | -0.23013100 |            | C              | -0.73302800 | 0.86921700     | -0.21396900 | C  | -0.83408300 | 0.76710700  | -0.22436700 |
| C  | -1.53592700 | -0.43990200 | -0.18767700 |            | C              | -1.43134800 | -0.28685000    | -0.32208700 | C  | -1.53638400 | -0.43988700 | -0.19403600 |
| O  | -1.42060400 | -2.80417700 | -0.20276400 |            | O              | -1.38430600 | -2.63495100    | -0.65219600 | O  | -1.42236400 | -2.80687400 | -0.20293200 |
| O  | 1.28259000  | -2.65840900 | -0.74652100 |            | O              | 1.37608700  | -2.64538300    | -0.60659100 | O  | 1.25963800  | -2.64710700 | -0.75435700 |
| Cl | 3.04646800  | -0.30144700 | -0.53069200 |            | Cl             | 3.16522100  | -0.32688200    | -0.31717900 | Cl | 3.03392000  | -0.30325600 | -0.55031200 |
| Cl | 1.37915700  | 2.40373700  | -0.26120500 |            | Cl             | 1.55822000  | 2.39678000     | -0.11535400 | Cl | 1.38347100  | 2.40750700  | -0.24658600 |
| Cl | -1.74548600 | 2.25502000  | -0.19497300 |            | Cl             | -1.55755000 | 2.39597000     | -0.07453500 | Cl | -1.74052800 | 2.25449900  | -0.18609900 |
| Cl | -3.28544400 | -0.49319500 | -0.06793000 |            | Cl             | -3.16885600 | -0.32051600    | -0.31014700 | Cl | -3.28753900 | -0.48060600 | -0.06760600 |
| H  | 1.11576000  | 0.77581000  | 2.46692500  |            | H              | 0.85953300  | -0.16428900    | 2.58732900  | H  | 1.08335200  | 0.69825300  | 2.57863000  |
| O  | 0.51315700  | 0.01982600  | 2.40447100  |            | O              | -0.07102000 | -0.37818000    | 2.42069000  | O  | 0.51758600  | -0.07240400 | 2.41390000  |
| O  | 1.27495600  | -0.94142300 | 1.71152100  |            | O              | -0.01070600 | -1.59668400    | 1.69811000  | O  | 1.33312600  | -0.92862100 | 1.65026900  |

\*: The optimized structures in aqueous solution are denoted by the PCM symbol.
